# Supplementary figures and images for: Electrochemical characterization of lithium 4,4′-tolane-dicarboxylate for use as a negative electrode in Li-ion batteries
Source: Royal Society of Chemistry journal article supplement (doi:10.1039/c0jm03458d), 2010-12-14

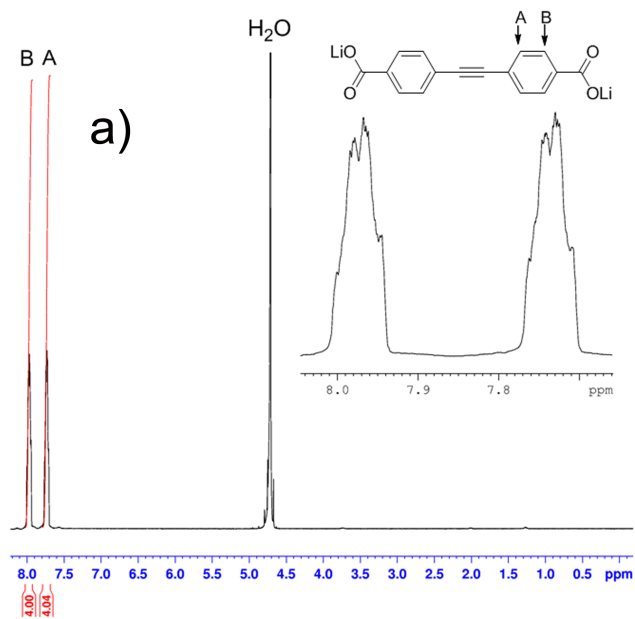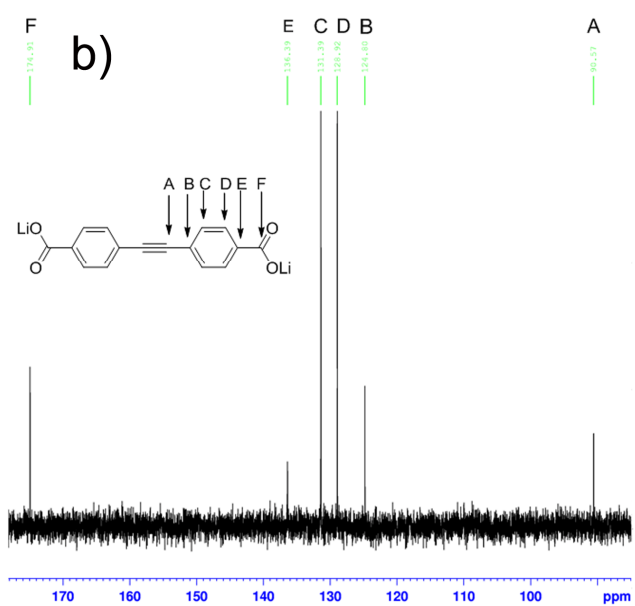

a) <sup>1</sup>H NMR and b) <sup>13</sup>C NMR spectra recorded in D<sub>2</sub>O of lithium 4,4'-tolane-dicarboxylate

Supplement: c0jm03458d.pdf [file c0jm03458d.pdf]
